# Supplementary material for: High frequencies of adaptive NK cells are associated with absence of coronary plaque in cytomegalovirus infected people living with HIV
Source: PubMed Central journal article supplement — Medicine (Baltimore). 2022 Sep 23;101(38):e30794. doi: 10.1097/MD.0000000000030794 (PMC9509172; doi:10.1097/md.0000000000030794), 2022-09-23

**Supplemental Figure 1. Distribution of NKG2C<sup>+</sup>CD57<sup>+</sup> adaptive NK (adapNK) cell frequency in CMV infected people living with human immunodeficiency virus (CMV<sup>+</sup>PLWH) and CMV mono-infected (CMV<sup>+</sup>HIV<sup>-</sup>) individuals.** The distribution of NKG2C<sup>+</sup>CD57<sup>+</sup> adapNK cells frequency was categorized into those with low, intermediate and high NKG2C<sup>+</sup>CD57<sup>+</sup> adapNK cell frequencies. in (A) CMV<sup>+</sup>PLWH and (B) CMV-mono-infected individuals. Each point represents a single individual. Bar graph heights and error bars represent medians and interquartile ranges for the group. A Kruskal-Wallis test with Dunn's post tests were used to analyze the significance of differences between groups. CMV, cytomegalovirus; PLWH, people living with HIV.; “\*\*\*”, p<0.01; “\*\*\*\*”, p<0.001; “\*\*\*\*\*”, p<0.0001.

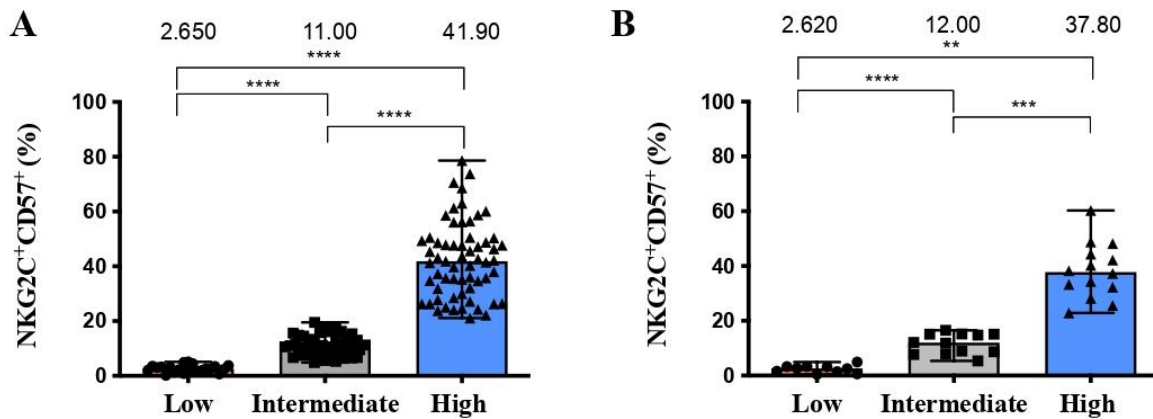

Supplement: medi-101-e30794-s001.pdf [file medi-101-e30794-s001.pdf]
