# Supplementary material for: High frequencies of adaptive NK cells are associated with absence of coronary plaque in cytomegalovirus infected people living with HIV
Source: PubMed Central journal article supplement — Medicine (Baltimore). 2022 Sep 23;101(38):e30794. doi: 10.1097/MD.0000000000030794 (PMC9509172; doi:10.1097/md.0000000000030794), 2022-09-23

**Supplemental Figure 2. Total plaque volume (TPV) in CMV infected people living with human immunodeficiency virus (CMV<sup>+</sup>PLWH) and CMV mono-infected (CMV<sup>+</sup>HIV<sup>-</sup>) individuals according to the level of NKG2C<sup>+</sup>CD57<sup>+</sup> adaptive NK cell (adapNK) expansion.**

(A) The y-axes show the TPV in CMV<sup>+</sup>PLWH and (B) CMV mono-infected (CMV<sup>+</sup>HIV<sup>-</sup>) individuals based on adapNK cell frequency level categories (low, intermediate and high). A Kruskal-Wallis test with Dunn's post tests were used to analyze the significance of differences between groups; “\*”, p<0.05. The “0” value for TPV was changed to 1 for this graph whose y-axis is plotted using a log scale.

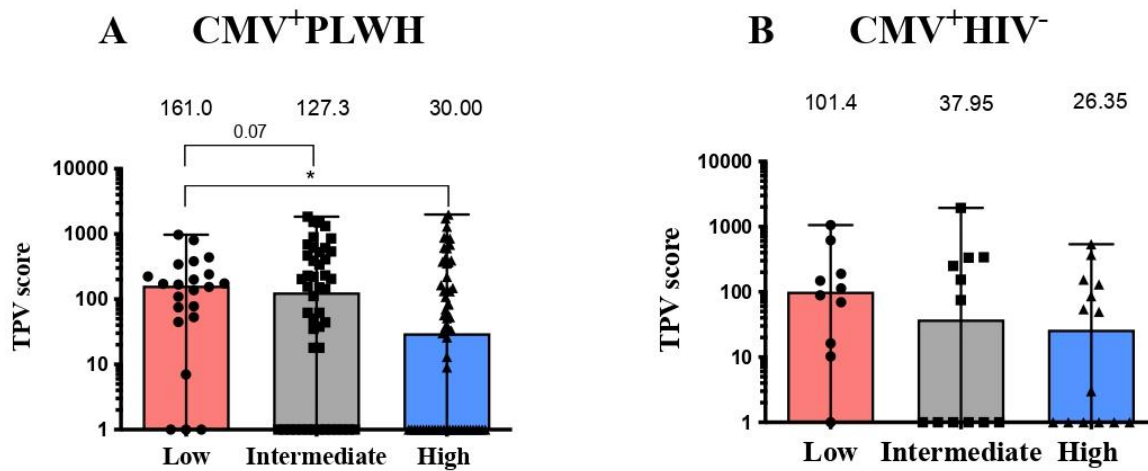

Supplement: medi-101-e30794-s002.pdf [file medi-101-e30794-s002.pdf]
